# Supplementary material for: From Primary Data to Ethnopharmacological Investigations on Achillea erba-rotta subsp. moschata (Wulfen) I.Richardson as a Remedy against Gastric Ailments in Valmalenco (Italy)
Source: MDPI journal article supplement (doi:10.3390/plants13040539), 2024-02-16
Supplement: s1 [file s1]

# From Primary Data to Ethnopharmacological Investigations on *Achillea erba-rota* subsp. *moschata* (Wulfen) I. Richardson as a Remedy against Gastric Ailments in Valmalenco (Italy)

Martina Bottoni <sup>1,2</sup>, Giulia Martinelli <sup>3</sup>, Nicole Maranta <sup>3</sup>, Emanuela Sabato <sup>1</sup>, Fabrizia Milani <sup>1,2,\*</sup>, Lorenzo Colombo <sup>1,2</sup>, Paola Sira Colombo <sup>1,2</sup>, Stefano Piazza <sup>3</sup>, Enrico Sangiovanni <sup>3</sup>, Claudia Giuliani <sup>1,2</sup>, Piero Bruschi <sup>4</sup>, Giulio Vistoli <sup>1</sup>, Mario Dell'Agli <sup>3</sup> and Gelsomina Fico <sup>1,2</sup>

<sup>1</sup> Department of Pharmaceutical Sciences, University of Milan, Via Mangiagalli 25, 20133 Milan, Italy; martina.bottoni@unimi.it (M.B.); emanuela.sabato@unimi.it (E.S.); lorecolo.93@gmail.com (L.C.); pasico19@virgilio.it (P.S.C.); claudia.giuliani@unimi.it (C.G.); giulio.vistoli@unimi.it (G.V.); gelsomina.fico@unimi.it (G.F.)

<sup>2</sup> Botanical Garden G.E. Ghirardi, Department of Pharmaceutical Sciences, University of Milan, Via Religione 25, 25088 Toscolano Maderno (BS) Italy

<sup>3</sup> Department of Pharmacological and Biomolecular Sciences "Rodolfo Paoletti", University of Milan, Via Balzaretti 9, 20133 Milan, Italy; giulia.martinelli@unimi.it (G.M.); nicole.maranta@unimi.it (N.M.); stefano.piazza@unimi.it (S.P.); enrico.sangiovanni@unimi.it (E.S.); mario.dellaghi@unimi.it (M.D.)

<sup>4</sup> Department of Agricultural, Environmental, Food and Forestry Science and Technology, University of Florence, Piazzale delle Cascine 18, 50144 Florence, Italy; piero.bruschi@unifi.it

\* Correspondence: fabrizia.milani@unimi.it

**Figure S1.** Cell viability (MTT test). GES-1 cells were treated for 6 h with TNF $\alpha$  (10 ng/mL) (panel A) or *H. pylori* (ratio 50:1, bacteria:cell) (panel B). Results were expressed as mean  $\pm$  SEM (at least three experiments) of the relative % in comparison to stimulus (black bar), to which the value of 100% was arbitrarily assigned. I, *A. erba-rotta* subsp. *moschata* infuse; D, *A. erba-rotta* subsp. *moschata* decoction; HE, *A. erba-rotta* subsp. *moschata* hydroethanolic extract.

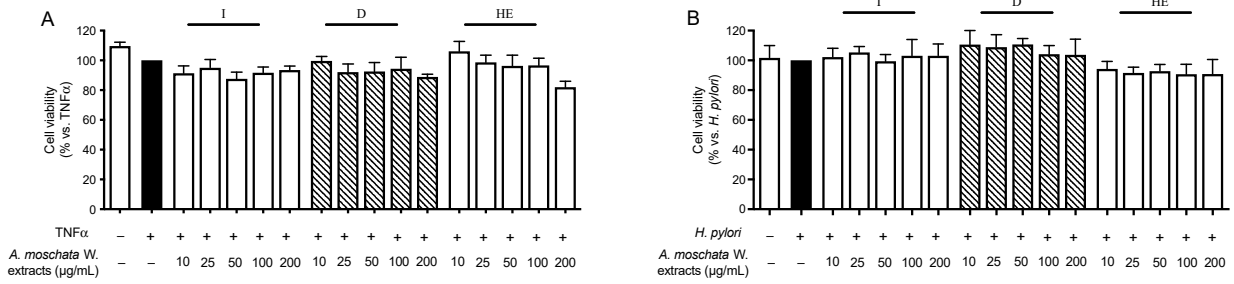

Table S1: Raw primary data recorded during the interviews: translation in English and original Italian sentence.

| English                                                                   | Italian                                                              |
|---------------------------------------------------------------------------|----------------------------------------------------------------------|
| With that, it either goes up or down                                      | <i>Con quella, o va su o va giù</i>                                  |
| It is a lifesaver                                                         | <i>È un salvavita</i>                                                |
| It is extraordinary                                                       | <i>È portentosa</i>                                                  |
| It is very bitter and powerful                                            | <i>È amarissima e molto potente</i>                                  |
| The bitter taste is the good effect                                       | <i>L'amaro è l'effetto buono</i>                                     |
| It is a medicinal herb, 3-4 flowers and it helps me digest                | <i>È un'erba medicinale, 3-4 fiorellini e mi fa digerire</i>         |
| It never hurts to drink it                                                | <i>Non fa mai male berla</i>                                         |
| However, you must not overdo it, too many flowers cause stomach-ache      | <i>Non bisogna esagerare, troppi fiori provocano mal di pancia</i>   |
| Very few flowers are enough to have an effect                             | <i>Bastano davvero pochi fiori per fare effetto</i>                  |
| It causes me tachycardia                                                  | <i>A me provoca tachicardia</i>                                      |
| I don't know the <i>erba iva</i> , I know the <i>daneda</i>               | <i>Non conosco l'erba iva, io conosco la daneda</i>                  |
| Everyone uses it in Valmalenco                                            | <i>Tutti la usano qui</i>                                            |
| <i>Erba iva</i> has never been lacking in our house                       | <i>L'erba iva non è mai mancata in casa nostra</i>                   |
| This is the manner here, you have to bring them together and let them dry | <i>Qui si fa così, devi riunirli e farli essiccare</i>               |
| The plant should never be torn off                                        | <i>La pianta non va mai strappata</i>                                |
| You have to cut it more or less at this height, moving the flowers        | <i>Devi tagliarla più o meno a questa altezza, spostando i fiori</i> |
| You must always leave the roots, if you want to find it again next year   | <i>Lascia sempre le radici, se vuoi ritrovarla l'anno prossimo</i>   |
| Don't pick it up here, my neighbor always comes here                      | <i>Qui non raccoglierla, ci viene sempre il mio vicino</i>           |
| It was the treasure that made survival possible                           | <i>Era il tesoro che permetteva di vivere</i>                        |
